# Supplementary material
Source: Springer Nature journal article supplement (https://www.springermedizin.de/resource/supplementary/12990_2010_353_MOESM7_ESM.pdf/9613098)
Supplement: MOESM7 [file 9613098]

**TABLE 1. Latency to observable movement following short-pulse (100 ms), high intensity stimulation with infrared diode laser (6.08 W/mm<sup>2</sup>)**

|                                                      | Standing on 2 or 3 paws | Standing on 4 paws | Total      |
|------------------------------------------------------|-------------------------|--------------------|------------|
| Total number of trials                               | 8                       | 8                  | 16         |
| Shortest latency to foLEM                            | 56 ms                   | 74 ms              | 56 ms      |
| †Fastest conduction velocity                         | 3.0 m/s                 | 2.3 m/s            | 3.0 m/s    |
| Mean latency to foLEM (±SEM)                         | 159.5±36.7 ms           | 250.0±28.9 ms      | 204.8±25.4 |
| †Mean conduction velocity                            | 1.1 m/s                 | 0.7 m/s            | 0.8 m/s    |
| Shortest latency to withdrawal of stimulated limb    | 74 ms                   | 128 ms             | 74 ms      |
| Mean latency to withdrawal of stimulated limb (±SEM) | 213.0±34.1              | 271.0±27.7         | 242.0±22.5 |

†Conduction velocities are likely a gross underestimation of the actual conduction velocities. They do not account for central delay (~80 ms in the rat; [32], motoneuron conduction velocity (33–85 m/s) [33] or the time required for muscle contraction/relaxation (34–116 ms) [33]. Nonetheless, we were able to demonstrate that it is possible to detect nocifensive behaviors that are temporally consistent with being mediated by A $\delta$ -fibers. The posture of the animal before stimulations appears to greatly influence our ability to detect movements with short or longer latencies.
